# Supplementary material for: Magnetic phase transition of Ag2S:Eu diluted magnetic semiconductor nanoparticles
Source: Royal Society of Chemistry journal article supplement (doi:10.1039/c4ra02361g), 2014-07-09
Supplement: c4ra02361g1.pdf [file c4ra02361g1.pdf]

# Supporting information for Magnetic Phase Transition of Ag<sub>2</sub>S:Eu Diluted Magnetic Semiconductor Nanoparticles

Tianye Yang, He Yang, Pan Wang, Rui Zhao, Chuanhai Xiao, Shuangming Wang,  
Bingxin Xiao, Zhifang Li and Mingzhe Zhang\*

State Key Laboratory of Superhard Materials, Jilin University, Changchun 130012, People's Republic of China.

\*Corresponding Author, E-mail address: zhangmz@jlu.edu.cn.

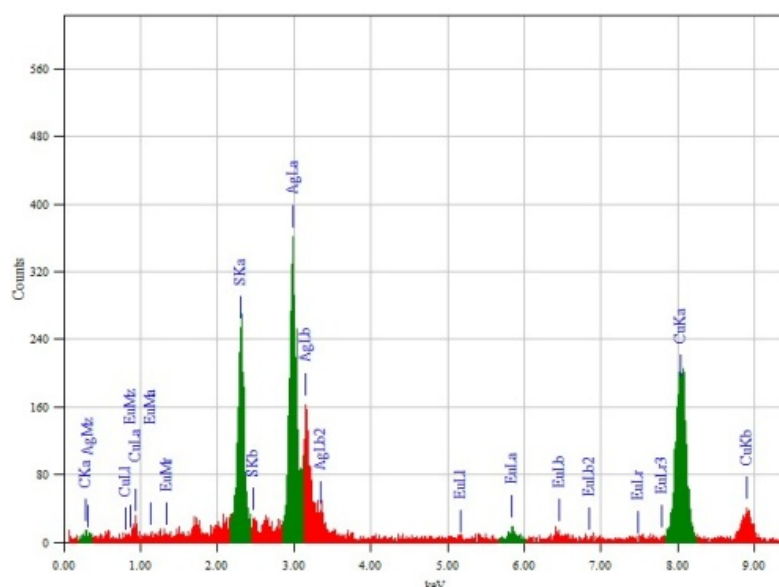

Fig S. 1 EDS spectrum of Ag<sub>2</sub>S:Eu (0.64 at%).

Table S 1 Element content percentage of the sample.

| Element | Weight (%) | Atom (%) |
|---------|------------|----------|
| S       | 26.94      | 32.37    |
| Ag      | 72.37      | 66.99    |
| Eu      | 0.69       | 0.64     |
| Total   | 100%       |          |

From the picture, we can observe that there are peaks of Ag, S and Eu elements and there are no other impurity peaks are observed. The peaks of C and Cu elements are from carbon support films and copper mesh. Make several measurements and calculations, then we get the average doping content of the sample which is in Table S1.
